# Supplementary material
Source: Springer Nature journal article supplement (https://mijn.bsl.nl/resource/supplementary/13047_2008_12_MOESM3_ESM.pdf/7108724)
Supplement: MOESM3 [file 7108724]



Circumference  
traced for cross-  
sectional area  
measurement

The image shows a longitudinal B-mode ultrasound scan of a blood vessel. A red line traces the inner boundary of the vessel lumen. On the right side, there are several vertical double-headed arrows indicating measurements. In the bottom left corner, there are some small letters 'G' and 'P'.
